# Supplementary material
Source: PubMed Central journal article supplement (PMC299895)
Supplement: pnas_100_25_15035__1.pdf [file pnas_100_25_15035__1.pdf]

**Table 2. Genes/ESTs whose expression was altered by MnTBAP****INCREASES**

| <b>GenBank</b> | <b>Gene name</b>                                                 | <b>SEB</b> | <b>MnTBAP</b> |
|----------------|------------------------------------------------------------------|------------|---------------|
| NM_007393      | actin, beta, cytoplasmic                                         | 4974       | 15129         |
| AA050769       |                                                                  | 5243       | 13571         |
| AA666984       |                                                                  | 4699       | 10896         |
| W83919         |                                                                  | 3179       | 8197          |
| AK011593       | RIKEN cDNA 2610028J07 gene                                       | 3319       | 7684          |
| AA261028       |                                                                  | 1873       | 6578          |
| D19392         |                                                                  | 1501       | 5558          |
| AA673180       |                                                                  | 2099       | 5021          |
| W17821         |                                                                  | 2029       | 4903          |
| BB208355       | ESTs, Highly similar to A30583 T-cell receptor delta chain precu | 1088       | 4313          |
| AA675026       |                                                                  | 1305       | 4276          |
| NM_018738      | interferon gamma induced GTPase                                  | 1038       | 3894          |
| BF782297       | DNA segment, Chr 17, Wayne State University 92, expressed        | 1598       | 3880          |
| NM_011306      | retinoid X receptor beta                                         | -2937      | 3702          |
| NM_007446      | amylase 1, salivary                                              | 1318       | 3316          |
| C78133         |                                                                  | 1381       | 3267          |
| NM_011900      | mannose-P-dolichol utilization defect 1                          | 1075       | 2720          |
| C79741         | expressed sequence C79741                                        | 1009       | 2348          |
| AK009844       | clathrin, light polypeptide (Lcb)                                | 809        | 2273          |
| AA021930       |                                                                  | 881        | 2238          |
| BB464776       | ESTs                                                             | 673        | 2153          |
| D32200         | helix-loop-helix transcription factor                            | 915        | 2102          |
| NM_013489      | CD84 antigen                                                     | 623        | 2050          |
| L00654         | Mus musculus mast cell protease-7 gene, complete cds             | 852        | 2015          |
| BC016105       | Mus musculus, clone MGC:27690 IMAGE:4921222, mRNA, cor           | 621        | 2002          |
| AK012951       | proteasome (prosome, macropain) 26S subunit, non-ATPase, 1       | 727        | 1933          |
| NM_010916      | nescient helix loop helix 1                                      | 693        | 1881          |
| L31532         | bcl2-alpha                                                       | 617        | 1827          |
| C78753         | 3' similar to Mus musculus ORR1a transposon-like element, clo    | 554        | 1822          |
| L31532         | bcl2-alpha                                                       | 561        | 1759          |
| NM_019949      | ubiquitin-conjugating enzyme 8                                   | 397        | 1757          |
| BC020078       | Mus musculus, Similar to RIKEN cDNA 1700066C05 gene, clon        | 477        | 1720          |
| NM_019949      | ubiquitin-conjugating enzyme 8                                   | 564        | 1686          |
| NM_021305      | SEC61, alpha subunit 2 (S. cerevisiae)                           | 699        | 1593          |
| NM_007930      | ectodermal-neural cortex 1                                       | 296        | 1560          |
| W91120         |                                                                  | 503        | 1549          |
| BC024462       | Mus musculus, similar to Unknown (protein for IMAGE:3610257      | 524        | 1541          |
| NM_133977      | transferrin                                                      | 302        | 1485          |
| NM_008380      | inhibin beta-A                                                   | 632        | 1443          |
| M30441         | M30441 Mouse intronless potassium channel gene MK3               | 597        | 1423          |
| W41826         | W41826 mc65f06.r1 Mus musculus cDNA, 5' end                      | 551        | 1393          |
| NM_019711      | RNA binding motif, single stranded interacting protein 2         | 198        | 1355          |
| NM_008714      | Notch gene homolog 1, (Drosophila)                               | 80         | 1348          |
| ET61286        | Mus musculus anti-DNA immunoglobulin heavy chain variable re     | 425        | 1339          |
| W35783         | W35783 mc15b07.r1 Mus musculus cDNA, 5' end                      | 469        | 1331          |
| L22181         | L22181 Mouse N-formyl peptide chemotactic receptor gene, cor     | 439        | 1264          |
| NM_011579      | T-cell specific GTPase                                           | 303        | 1256          |
| U12565         | defensin-like gene 4C-4                                          | 382        | 1255          |

|           |                                                                          |     |      |
|-----------|--------------------------------------------------------------------------|-----|------|
| NM_016660 | high mobility group AT-hook 1                                            | 486 | 1222 |
| NM_008795 | PCTAIRE-motif protein kinase 3                                           | 213 | 1212 |
| NM_007502 | ATPase, Na <sup>+</sup> /K <sup>+</sup> transporting, beta 3 polypeptide | 522 | 1202 |
| D00622    | low density lipoprotein receptor-related protein associated protei       | 518 | 1193 |
| BC017678  | ral guanine nucleotide dissociation stimulator,-like 1                   | 478 | 1191 |
| ET61506   | Mus musculus transcription factor Id1B (Id1B) mRNA, complete             | 223 | 1181 |
| NM_007923 | ELK4, member of ETS oncogene family                                      | 421 | 1181 |
| C78246    |                                                                          | 319 | 1167 |
| AK010554  | guanine nucleotide binding protein (G protein), gamma transduc           | 466 | 1160 |
| BC008989  | Mus musculus, Similar to nuclear receptor subfamily 1, group D.          | 408 | 1152 |
| AK018607  | RIKEN cDNA 9130011E15 gene                                               | 361 | 1108 |
| AK011557  | RIKEN cDNA 2610025P08 gene                                               | 427 | 1094 |
| AA061566  |                                                                          | 347 | 1058 |
| W10082    |                                                                          | 393 | 1042 |
| C78577    | ESTs, Moderately similar to LPH RAT LACTASE-PHLORIZIN H                  | 385 | 1034 |
| NM_019781 | peroxisomal biogenesis factor 14                                         | 49  | 1026 |
| NM_133784 | RIKEN cDNA 2310058J06 gene                                               | 260 | 985  |
| AF263240  | Down syndrome critical region homolog 1 (human)                          | 416 | 979  |
| BC017161  | RIKEN cDNA 2010306G19 gene                                               | 306 | 961  |
| BF120574  | expressed sequence C81206                                                | 256 | 922  |
| AA407599  |                                                                          | 358 | 884  |
| M12815    | Mouse T-cell receptor active gamma-chain V10.8B-J-C10.8 mR               | 382 | 884  |
| BI658322  | ESTs, Highly similar to T00361 hypothetical protein KIAA0678 [f          | 370 | 879  |
| NM_010577 | integrin alpha 5 (fibronectin receptor alpha)                            | 241 | 790  |
| AA080228  |                                                                          | 253 | 785  |
| BF138536  | EST X83313                                                               | 289 | 773  |
| D28530    | protein tyrosine phosphatase, receptor type, S                           | 210 | 752  |
| NM_007795 | cardiotrophin 1                                                          | 110 | 721  |
| NM_019759 | dermatopontin                                                            | 23  | 718  |
| ET63482   | Mus musculus synaptonemal complex protein 1 (Scp1) gene, e)              | 294 | 692  |
| D50095    | D50095 Mouse DNA for histamine H1 receptor, complete cds                 | 125 | 685  |
| AA409818  | DNA segment, Chr 2, Wayne State University 58, expressed                 | 227 | 685  |
| X12729    | Mouse (clone RAD11) T-cell receptor rearranged delta-chain mf            | 207 | 685  |
| AF151110  | constitutive photomorphogenic protein 1 (Arabidopsis)                    | 179 | 683  |
| M76987    | Mouse alpha-globin transcription factor CP2 mRNA sequence                | 122 | 667  |
| NM_030724 | uridine-cytidine kinase 2                                                | 254 | 663  |
| NM_030694 | interferon induced transmembrane protein 3-like                          | 286 | 660  |
| AA104348  |                                                                          | 95  | 657  |
| AK005205  | RIKEN cDNA 2700089E24 gene                                               | 248 | 641  |
| BC016230  | Mus musculus, Similar to BCL2-associated athanogene 2, clone             | 254 | 639  |
| AV254076  | ESTs, Highly similar to T31099 myosin-RhoGAP protein, Myr 7              | 215 | 636  |
| NM_008326 | interferon inducible protein 1                                           | 145 | 629  |
| NM_020009 | FK506 binding protein 12-rapamycin associated protein 1                  | 265 | 607  |
| NM_011126 | palate, lung, and nasal epithelium expressed transcript                  | 255 | 594  |
| NM_016757 | WW domain binding protein 1                                              | 182 | 594  |
| AJ278733  | myosin, heavy polypeptide 4, skeletal muscle                             | 238 | 588  |
| NM_138600 | DNA segment, Chr 18, Wayne State University 181, expressed               | 203 | 581  |
| X96606    | ovary testis transcribed                                                 | 54  | 565  |
| NM_010914 | nuclear transcription factor-Y beta                                      | 229 | 564  |
| NM_007855 | dermis expressed 1                                                       | 187 | 542  |
| BI410554  | DNA segment, Chr 16, ERATO Doi 36, expressed                             | 107 | 529  |
| NM_010313 | guanine nucleotide binding protein, beta 5                               | 189 | 523  |

|           |                                                               |     |     |
|-----------|---------------------------------------------------------------|-----|-----|
| NM_009605 | adipocyte complement related protein of 30 kDa                | 179 | 522 |
| J03458    | filaggrin                                                     | 133 | 519 |
| ET61970   | Mus musculus anti-DNA immunoglobulin light chain IgG, antibox | 107 | 509 |
| NM_017473 | retinol dehydrogenase 7                                       | 61  | 504 |
| NM_025946 | RIKEN cDNA 2010100O12 gene                                    | 187 | 491 |
| NM_026810 | mutL homolog 1 (E. coli)                                      | 43  | 480 |
| AK005067  | calcium binding protein P22                                   | 193 | 472 |
| W13112    |                                                               | 77  | 464 |
| ET61832   | Mus musculus anti-DNA immunoglobulin heavy chain IgG mRNA,    | 161 | 450 |
| BC026653  | Mus musculus, clone IMAGE:4988271, mRNA, partial cds          | 190 | 441 |
| NM_007996 | ferredoxin 1                                                  | 136 | 428 |
| AK003407  | RIKEN cDNA 1110004C05 gene                                    | 111 | 422 |
| AA497657  | ESTs                                                          | 100 | 421 |
| AK007743  | RIKEN cDNA 1810041F13 gene                                    | 28  | 418 |
| AK010101  | RIKEN cDNA 2310068B06 gene                                    | 128 | 409 |
| NM_016777 | nuclear autoantigenic sperm protein (histone-binding)         | 150 | 394 |
| BG067016  | expressed sequence C80993                                     | 119 | 390 |
| NM_008068 | gamma-aminobutyric acid (GABA-A) receptor, subunit alpha 6    | 155 | 383 |
| AA120203  |                                                               | 102 | 382 |
| X69722    | insulin receptor substrate 1                                  | 117 | 377 |
| NM_018796 | eukaryotic translation elongation factor 1 beta 2             | 156 | 370 |
| NM_008363 | interleukin 1 receptor-associated kinase                      | 121 | 360 |
| NM_011321 | spermine binding protein                                      | 150 | 359 |
| BF120858  | neoplastic progression 3                                      | 62  | 340 |
| AK011489  | replication factor C (activator 1) 5 (36.5 kDa)               | 39  | 326 |
| ET61617   | Mus musculus 5E6 (5E6/Ly-49C) mRNA, complete cds.             | 129 | 312 |
| M33467    | dilute gene                                                   | 124 | 311 |
| ET61828   | Mus musculus anti-DNA immunoglobulin heavy chain IgG mRNA,    | 110 | 305 |
| NM_008706 | NAD(P)H dehydrogenase, quinone 1                              | 118 | 296 |
| AK015641  | Mus musculus adult male testis cDNA, RIKEN full-length enrich | 33  | 295 |
| NM_010107 | ephrin A1                                                     | 128 | 293 |
| NM_016885 | endomucin                                                     | 25  | 282 |
| AK011289  | RIKEN cDNA 2310021G01 gene                                    | 116 | 279 |
| ET61316   | Mus musculus senescence marker protein-30 (SMP30) gene, p     | 112 | 276 |
| AA015388  |                                                               | 84  | 275 |
| D19392    |                                                               | 60  | 275 |
| AK011097  | RIKEN cDNA 2510042P03 gene                                    | 36  | 274 |
| AK019543  | RIKEN cDNA 4921528G01 gene                                    | 20  | 274 |
| NM_027139 | TAF9 RNA polymerase II, TATA box binding protein (TBP)-assoc  | 37  | 265 |
| AK015640  | RIKEN cDNA 4930487N19 gene                                    | -31 | 258 |
| AI036902  | expressed sequence AI666798                                   | 109 | 255 |
| NM_010390 | histocompatibility 2, Q region locus 1                        | -21 | 253 |
| ET62271   | Mus musculus T cell receptor variable and J region mRNA, part | -96 | 243 |
| AK012809  | RIKEN cDNA 2810025E10 gene                                    | 85  | 239 |
| AF453686  | Mus musculus ELKL motif serine-threonine protein kinase 3 (En | 66  | 234 |
| NM_011314 | serum amyloid A 2                                             | 94  | 233 |
| NM_020047 | tumor-associated calcium signal transducer 2                  | 17  | 220 |
| C80171    | expressed sequence C80171                                     | 57  | 219 |
| W54015    |                                                               | 64  | 219 |
| AA168759  |                                                               | 38  | 213 |
| BG966849  | expressed sequence AW050213                                   | -6  | 212 |
| NM_011456 | serine protease inhibitor 14                                  | 52  | 204 |

|           |                                                           |     |     |
|-----------|-----------------------------------------------------------|-----|-----|
| AK008264  | inhibitor of DNA binding 1                                | 22  | 203 |
| BC005601  | RIKEN cDNA 1110061A19 gene                                | 80  | 197 |
| NM_008939 | protease, serine, 12 neurotrypsin, (motopsin)             | 79  | 187 |
| AK012621  | RIKEN cDNA 2700097O09 gene                                | 60  | 185 |
| NM_009888 | complement component factor h                             | 19  | 185 |
| NM_008042 | formyl peptide receptor-like 1                            | 72  | 181 |
| NM_026515 | RIKEN cDNA 2810417H13 gene                                | 49  | 177 |
| W62058    |                                                           | 39  | 175 |
| AV297961  | expressed sequence AA407887                               | 68  | 172 |
| BC006696  | casein beta                                               | 65  | 166 |
| NM_021516 | MAP/microtubule affinity-regulating kinase 3              | 68  | 166 |
| NM_013778 | aldo-keto reductase family 1, member C13                  | 43  | 160 |
| BE572956  | expressed sequence C81439                                 | 23  | 159 |
| NM_009352 | telomeric repeat binding factor 1                         | 61  | 157 |
| AA116410  |                                                           | 19  | 153 |
| AA138813  |                                                           | 47  | 147 |
| ET61833   | Mus musculus anti-DNA immunoglobulin heavy chain IgG mRNA | 6   | 145 |
| AA419684  |                                                           | -32 | 140 |
| AA140339  |                                                           | 37  | 135 |
| AA022064  |                                                           | 46  | 131 |
| NM_029814 | RIKEN cDNA 2210412K09 gene                                | 38  | 131 |
| NM_053089 | NMDA receptor-regulated gene 1                            | -2  | 124 |
| W55727    |                                                           | -77 | 122 |
| AK012326  | RIKEN cDNA 2700038B03 gene                                | 37  | 121 |
| NM_013498 | cAMP responsive element modulator                         | 29  | 119 |
| NM_023396 | RIKEN cDNA 2410012A13 gene                                | -7  | 117 |
| AK019451  | eukaryotic translation initiation factor 1A               | 17  | 113 |
| NM_008591 | met proto-oncogene                                        | -6  | 111 |
| NM_013489 | CD84 antigen                                              | 22  | 101 |
| BG066461  | expressed sequence C79246                                 | 42  | 101 |

#### DECREASES

| Genbank   | Gene Name                                                          | SEB   | MnTBAP |
|-----------|--------------------------------------------------------------------|-------|--------|
| W97321    |                                                                    | 13285 | 5110   |
| AA072109  |                                                                    | 9858  | 3109   |
| NM_010907 | nuclear factor of kappa light chain gene enhancer in B-cells inhil | 6159  | 3278   |
| NM_013866 | zinc finger protein 385                                            | 5894  | 2898   |
| AK004554  | actin-related protein 3 homolog (yeast)                            | 5444  | 2628   |
| NM_010365 | general transcription factor II I                                  | 4978  | 2524   |
| BC003707  | SEC61, alpha subunit (S. cerevisiae)                               | 4526  | 1210   |
| BI653637  | expressed sequence AI852829                                        | 4079  | 1939   |
| M21050    |                                                                    | 3953  | 792    |
| BC021473  | CDP-diacylglycerol--inositol 3-phosphatidyltransferase (phospha    | 3838  | 1543   |
| NM_019909 | MHC (A.CA/J(H-2K-f) class I antigen                                | 3634  | 1965   |
| NM_008906 | protective protein for beta-galactosidase                          | 3219  | 1615   |
| BB615967  | ESTs, Weakly similar to ANK1 MOUSE ANKYRIN 1 [M.muscul             | 3195  | 1805   |
| NM_018772 | brain protein I3                                                   | 2841  | 1247   |
| NM_133937 | RIKEN cDNA 6720456B07 gene                                         | 2793  | 1537   |
| NM_008672 | nucleosome assembly protein 1-like 4                               | 2663  | 886    |

|           |                                                                        |      |      |
|-----------|------------------------------------------------------------------------|------|------|
| AA409750  |                                                                        | 2609 | 1154 |
| NM_010286 | glucocorticoid-induced leucine zipper                                  | 2597 | 1277 |
| NM_007494 | argininosuccinate synthetase 1                                         | 2569 | 1105 |
| C77340    | DNA segment, Chr 10, ERATO Doi 73, expressed                           | 2549 | 1337 |
| AJ131777  | src-like adaptor protein                                               | 2430 | 627  |
| BC011152  | expressed sequence AW125446                                            | 2415 | 1304 |
| NM_133206 | zinc ring finger protein 1                                             | 2378 | 1299 |
| NM_133697 | RIKEN cDNA 1110003E01 gene                                             | 2350 | 1312 |
| NM_011787 | autocrine motility factor receptor                                     | 2207 | 1231 |
| NM_023215 | RIKEN cDNA 2500003M10 gene                                             | 2197 | 1181 |
| BC024835  | Mus musculus, clone IMAGE:5355658, mRNA                                | 2184 | 725  |
| NM_011390 | solute carrier family 12, member 7                                     | 2087 | 184  |
| NM_026552 | actin related protein 2/3 complex, subunit 4 (20 kDa)                  | 2012 | 923  |
| NM_026145 | RIKEN cDNA 4631401O15 gene                                             | 1983 | 1028 |
| C78749    | DNA segment, Chr 11, ERATO Doi 204, expressed                          | 1981 | 789  |
| NM_021538 | coatamer protein complex, subunit epsilon                              | 1944 | 1035 |
| NM_013595 | methyl-CpG binding domain protein 3                                    | 1849 | 913  |
| BC024856  | RIKEN cDNA 1700016A15 gene                                             | 1788 | 936  |
| NM_030238 | dynein, cytoplasmic, heavy chain 1                                     | 1765 | 820  |
| AK011290  | RIKEN cDNA 5730409F23 gene                                             | 1762 | 916  |
| NM_025710 | RIKEN cDNA 4430402G14 gene                                             | 1683 | 849  |
| NM_030702 | smt3-specific isopeptidase 1                                           | 1679 | 726  |
| NM_018749 | eukaryotic translation initiation factor 3, subunit 7 (zeta, 66/67 kI  | 1602 | 668  |
| AK005267  | RIKEN cDNA 1500016L11 gene                                             | 1578 | 808  |
| AK003990  | RIKEN cDNA 1110030L07 gene                                             | 1572 | 808  |
| NM_015749 | transcobalamin 2                                                       | 1558 | 627  |
| AK012154  | phenylalanine-tRNA synthetase-like                                     | 1558 | 686  |
| AK019874  | RIKEN cDNA 5031419I10 gene                                             | 1554 | 337  |
| BC004811  | Mus musculus, clone IMAGE:3588242, mRNA, partial cds                   | 1495 | 503  |
| NM_023240 | eukaryotic translation elongation factor 1 delta (guanine nucleoti     | 1495 | 345  |
| BF180997  | expressed sequence D18386                                              | 1484 | 676  |
| NM_028784 | RIKEN cDNA 1200014I03 gene                                             | 1457 | 829  |
| W88176    |                                                                        | 1448 | 781  |
| NM_011103 | protein kinase C, delta                                                | 1446 | 740  |
| NM_007406 | adenylate cyclase 7                                                    | 1409 | 764  |
| NM_026219 | RIKEN cDNA 2210415M14 gene                                             | 1336 | 651  |
| AA415813  | expressed sequence AA415813                                            | 1332 | 652  |
| NM_010500 | immediate early response 5                                             | 1283 | 722  |
| NM_022310 | heat shock 70kD protein 5 (glucose-regulated protein, 78kD)            | 1280 | 388  |
| AA415488  | expressed sequence AA415488                                            | 1279 | 651  |
| NM_007932 | endoglin                                                               | 1274 | 635  |
| NM_009279 | signal sequence receptor, delta                                        | 1250 | 535  |
| BC011391  | upstream regulatory element binding protein 1                          | 1246 | 584  |
| NM_010286 | glucocorticoid-induced leucine zipper                                  | 1232 | 476  |
| NM_007948 | excision repair cross-complementing rodent repair deficiency, $\alpha$ | 1219 | 590  |
| NM_009048 | RalBP1 associated Eps domain containing protein                        | 1200 | 661  |
| BC026689  | Mus musculus, Similar to KIAA0310 gene product, clone IMAGE            | 1196 | 433  |
| NM_026578 | nucleolar protein family A, member 1 (H/ACA small nucleolar R1         | 1193 | 607  |
| AA272183  | ESTs, Highly similar to BAND 3 ANION EXCHANGE PROTEIN                  | 1192 | 475  |
| NM_021465 | stromal antigen 2                                                      | 1189 | 533  |
| ET61635   |                                                                        | 1180 | 486  |
| NM_138607 | DNA segment, human DXS9928E                                            | 1151 | 505  |

|           |                                                                   |      |      |
|-----------|-------------------------------------------------------------------|------|------|
| NM_013671 | superoxide dismutase 2, mitochondrial                             | 1141 | 429  |
| BC002196  | RIKEN cDNA 2810442O16 gene                                        | 1140 | 335  |
| BF532860  | ESTs, Highly similar to E2BE RAT TRANSLATION INITIATION           | 1140 | 605  |
| NM_011722 | dynactin 6                                                        | 1139 | 467  |
| NM_017380 | septin 9                                                          | 1132 | 518  |
| AW553439  | ESTs, Weakly similar to A54602 microtubule-associated serine/     | 1113 | 507  |
| U68543    | immunoglobulin kappa chain variable 28 (V28)                      | 1112 | 133  |
| BI456439  | expressed sequence AI854770                                       | 1103 | 503  |
| BC011111  | RIKEN cDNA 0610038P07 gene                                        | 1099 | 441  |
| W57485    |                                                                   | 1089 | 555  |
| NM_011738 | tyrosine 3-monooxygenase/tryptophan 5-monooxygenase activa        | 1086 | 377  |
| AK018452  | RIKEN cDNA 8430430L24 gene                                        | 1084 | 424  |
| AA146127  |                                                                   | 1081 | 543  |
| BC027391  | Mus musculus, clone MGC:36924 IMAGE:4945988, mRNA, cor            | 1078 | 517  |
| BI150493  | RIKEN cDNA 1810058I24 gene                                        | 1058 | 569  |
| AK005213  | RIKEN cDNA 1500011J06 gene                                        | 1055 | 558  |
| AK005710  | solute carrier family 25 (mitochondrial deoxynucleotide carrier), | 1043 | 407  |
| BG963836  | expressed sequence AW558298                                       | 1032 | 570  |
| NM_011368 | src homology 2 domain-containing transforming protein C1          | 1025 | 554  |
| NM_013850 | ATP-binding cassette, sub-family A (ABC1), member 7               | 1022 | 92   |
| BC017687  | ubiquinol-cytochrome c reductase core protein 1                   | 1020 | 327  |
| BC007171  | Mus musculus, clone MGC:7530 IMAGE:3492114, mRNA, com             | 1001 | 513  |
| C78749    | DNA segment, Chr 11, ERATO Doi 204, expressed                     | 999  | 404  |
| ET62534   |                                                                   | 988  | 537  |
| AK014542  | huntingtin interacting protein 1 related                          | 975  | 327  |
| W55037    |                                                                   | 970  | 524  |
| NM_019479 | hairy and enhancer of split 6, (Drosophila)                       | 964  | 531  |
| AF411100  | RIKEN cDNA 4933424M23 gene                                        | 957  | 371  |
| NM_026572 | RIKEN cDNA 5730591C18 gene                                        | 953  | -670 |
| NM_028152 | MMS19 (MET18 S. cerevisiae)-like                                  | 947  | 417  |
| NM_008138 | guanine nucleotide binding protein, alpha inhibiting 2            | 946  | 87   |
| BC012408  | calnexin                                                          | 912  | 465  |
| BC026492  | Mus musculus, clone MGC:31579 IMAGE:4505095, mRNA, cor            | 907  | 507  |
| W66763    |                                                                   | 897  | 51   |
| NM_080461 | zinc finger protein 358                                           | 891  | 446  |
| BC006916  | Mus musculus, clone MGC:11980 IMAGE:3601364, mRNA, cor            | 889  | -459 |
| AK012540  | tyrosine 3-monooxygenase/tryptophan 5-monooxygenase activa        | 882  | 213  |
| NM_026257 | RIKEN cDNA 4930506L07 gene                                        | 874  | 341  |
| BF144180  | expressed sequence AA409944                                       | 863  | 465  |
| NM_025888 | RIKEN cDNA 2410004N11 gene                                        | 857  | 417  |
| BC024870  | RIKEN cDNA 2610306D21 gene                                        | 852  | 305  |
| NM_018739 | retinitis pigmentosa 9 homolog (human)                            | 847  | 454  |
| BC006897  | expressed sequence AI606441                                       | 847  | 328  |
| BI658479  | expressed sequence AI465155                                       | 846  | 194  |
| AK004929  | RIKEN cDNA 1300007F04 gene                                        | 835  | 430  |
| BI734501  | expressed sequence AA414969                                       | 834  | 275  |
| AF316548  | zinc finger protein 148                                           | 832  | 386  |
| AK014485  | RIKEN cDNA 4432411E13 gene                                        | 825  | 388  |
| NM_024289 | oxysterol binding protein homolog 1                               | 807  | -335 |
| NM_007828 | death-associated kinase 3                                         | 795  | 433  |
| NM_011803 | core promoter element binding protein                             | 792  | 349  |
| NM_019772 | small acidic protein                                              | 792  | 420  |

|           |                                                                |     |      |
|-----------|----------------------------------------------------------------|-----|------|
| NM_134002 | expressed sequence AI463719                                    | 791 | 422  |
| AK012944  | U2 small nuclear ribonucleoprotein B                           | 786 | 409  |
| NM_024183 | RIKEN cDNA 1300019H17 gene                                     | 783 | 414  |
| BC004085  | expressed sequence AA410158                                    | 782 | 394  |
| AF075461  | development and differentiation enhancing                      | 778 | 366  |
| NM_029780 | v-raf-1 leukemia viral oncogene 1                              | 770 | 35   |
| AK005067  | calcium binding protein P22                                    | 770 | 396  |
| NM_018804 | synaptotagmin 11                                               | 769 | 387  |
| X15769    |                                                                | 757 | 280  |
| BG244345  | ESTs, Weakly similar to FAN MOUSE PROTEIN FAN [M.muscu         | 752 | 342  |
| NM_008220 | hemoglobin, beta adult major chain                             | 718 | 338  |
| BC028520  | RIKEN cDNA 2410012M21 gene                                     | 718 | 89   |
| BC012039  | RIKEN cDNA 1210001E11 gene                                     | 716 | 363  |
| AK008434  | RIKEN cDNA 2010204I15 gene                                     | 715 | 374  |
| BF121623  | ESTs, Weakly similar to KHL1_MOUSE Kelch-like protein 1 [M.i   | 708 | 262  |
| BC027439  | RIKEN cDNA 0710007A14 gene                                     | 703 | 137  |
| BI156837  | DNA segment, Chr 11, Brigham & Women's Genetics 0554 exp       | 694 | 371  |
| NM_019702 | Hbs1-like (S. cerevisiae)                                      | 694 | -120 |
| AK018785  | RAS-like protein expressed in many tissues                     | 688 | 358  |
| NM_033072 | DNA segment, Chr 10, Wayne State University 93, expressed      | 685 | 389  |
| AK011462  | RIKEN cDNA 2610019F03 gene                                     | 682 | -144 |
| NM_013916 | Hoxa1 regulated gene                                           | 682 | 303  |
| NM_026080 | RIKEN cDNA 3110030K20 gene                                     | 678 | 321  |
| BC018220  | RIKEN cDNA 1810041M12 gene                                     | 673 | 233  |
| NM_008672 | nucleosome assembly protein 1-like 4                           | 672 | 353  |
| BG071922  | DNA segment, Chr 6, ERATO Doi 365, expressed                   | 671 | 285  |
| NM_024226 | reticulon 4                                                    | 671 | 320  |
| BF142489  | expressed sequence AW212954                                    | 669 | 335  |
| AK017878  | RIKEN cDNA 5730589N07 gene                                     | 661 | 266  |
| AA166502  |                                                                | 660 | 326  |
| BF135165  | expressed sequence AI447560                                    | 660 | -21  |
| NM_013635 | pantophysin                                                    | 660 | 332  |
| NM_009844 | CD19 antigen                                                   | 654 | -253 |
| AA098588  |                                                                | 652 | 301  |
| BI693493  | expressed sequence AI447437                                    | 646 | 77   |
| AK014325  | RAE1 RNA export 1 homolog (S. pombe)                           | 634 | 234  |
| AK010171  | RIKEN cDNA 1110064N10 gene                                     | 634 | 299  |
| NM_019774 | A kinase (PRKA) anchor protein 8                               | 628 | 347  |
| BG867519  | expressed sequence AI843547                                    | 626 | 311  |
| NM_133247 | Vhlh-interacting deubiquitinating enzyme 1                     | 626 | 314  |
| AA155099  |                                                                | 624 | 300  |
| NM_009396 | tumor necrosis factor, alpha-induced protein 2                 | 621 | 337  |
| AF374266  | sterol regulatory element binding factor 1                     | 620 | -102 |
| ET62993   |                                                                | 616 | 318  |
| AY007594  | transcription factor 20                                        | 616 | 205  |
| BC024910  | RIKEN cDNA 1700016D08 gene                                     | 614 | 124  |
| NM_010794 | mannoside acetylglucosaminyltransferase 1                      | 612 | -180 |
| X54327    | M.musculus mRNA for glutamyl-tRNA synthetase                   | 599 | 300  |
| AK006556  | RIKEN cDNA 1700030K07 gene                                     | 587 | 296  |
| NM_025647 | RIKEN cDNA 0610011D08 gene                                     | 583 | 296  |
| BC003941  | Mus musculus, Similar to zinc finger protein ANC_2H01, clone M | 582 | 227  |
| NM_008292 | hydroxysteroid (17-beta) dehydrogenase 4                       | 579 | 275  |

|           |                                                                    |     |       |
|-----------|--------------------------------------------------------------------|-----|-------|
| NM_008577 | solute carrier family 3 (activators of dibasic and neutral amino a | 572 | -611  |
| AK012120  | RIKEN cDNA 2610511I23 gene                                         | 568 | 322   |
| NM_026175 | RIKEN cDNA 1200014H24 gene                                         | 565 | 248   |
| BC016637  | Mus musculus, general transcription factor IIB, clone MGC:6859     | 562 | -181  |
| AK012358  | ring finger protein 2                                              | 559 | 82    |
| NM_133948 | expressed sequence AU015605                                        | 555 | 268   |
| AK004894  | RIKEN cDNA 1300004C08 gene                                         | 552 | -1083 |
| NM_026519 | RIKEN cDNA 2610318K02 gene                                         | 543 | 303   |
| W64698    |                                                                    | 542 | 288   |
| NM_134012 | expressed sequence AA408199                                        | 540 | -205  |
| NM_025859 | RIKEN cDNA 2310008D22 gene                                         | 539 | 217   |
| W50532    |                                                                    | 539 | 250   |
| BF158662  | DNA segment, Chr 7, ERATO Doi 373, expressed                       | 537 | 269   |
| NM_007622 | chromobox homolog 1 (Drosophila HP1 beta)                          | 535 | 198   |
| NM_019502 | fractured callus expressed transcript 1                            | 532 | 256   |
| NM_028221 | expressed sequence AI596259                                        | 530 | 50    |
| AK012726  | DNA segment, Chr 3, Wayne State University 161, expressed          | 530 | 176   |
| NM_011740 | tyrosine 3-monooxygenase/tryptophan 5-monooxygenase activa         | 521 | 263   |
| BC013716  | heat shock factor 1                                                | 520 | 252   |
| AA024320  |                                                                    | 519 | -67   |
| BC025618  | Mus musculus, Similar to ATPase, Na+/K+ transporting, alpha 1      | 517 | 28    |
| NM_021537 | serine/threonine kinase 25 (yeast)                                 | 513 | 245   |
| NM_019489 | peptidylprolyl isomerase E (cyclophilin E)                         | 509 | 281   |
| BG861930  | ESTs, Weakly similar to ROA2 MOUSE HETEROGENEOUS NI                | 507 | 124   |
| NM_134054 | RIKEN cDNA 1110002B05 gene                                         | 502 | 169   |
| W85397    |                                                                    | 496 | 226   |
| AK017321  | RIKEN cDNA 5430419M09 gene                                         | 486 | 262   |
| BB500071  | expressed sequence AA408306                                        | 486 | 257   |
| M77167    | activating transcription factor 2                                  | 486 | 136   |
| AF332052  | expressed sequence AW538652                                        | 486 | 265   |
| AK005756  | RIKEN cDNA 1700008C22 gene                                         | 483 | 237   |
| AK008985  | RIKEN cDNA 2210419D22 gene                                         | 481 | 262   |
| BF164652  | RIKEN cDNA 1110029L11 gene                                         | 481 | 128   |
| BF682388  | expressed sequence AI317193                                        | 479 | 189   |
| AA087332  |                                                                    | 477 | 231   |
| BI106830  | expressed sequence AI450346                                        | 474 | 45    |
| NM_009897 | creatine kinase, mitochondrial 1, ubiquitous                       | 472 | 129   |
| NM_010926 | neighbor of Cox4                                                   | 462 | 261   |
| BC028325  | G1 to phase transition 1                                           | 460 | 223   |
| BC020156  | Mus musculus, Similar to hypothetical gene MGC1127, clone M        | 458 | 238   |
| NM_020587 | splicing factor, arginine/serine-rich 4 (SRp75)                    | 458 | -437  |
| NM_009287 | stromal interaction molecule 1                                     | 457 | -98   |
| NM_025936 | RIKEN cDNA 2610011N19 gene                                         | 455 | 204   |
| NM_009125 | spinocerebellar ataxia 2 homolog (human)                           | 455 | 141   |
| AK020739  | DNA segment, Chr 9, Wayne State University 149, expressed          | 454 | -149  |
| BC009147  | DEAD/H (Asp-Glu-Ala-Asp/His) box polypeptide 16                    | 453 | 252   |
| BC026459  | small EDRK-rich factor 2                                           | 447 | 212   |
| NM_009722 | ATPase, Ca++ transporting, cardiac muscle, slow twitch 2           | 446 | 30    |
| BC008232  | Mus musculus, clone IMAGE:2647796, mRNA                            | 440 | 184   |
| BG067008  | DNA segment, Chr 2, ERATO Doi 52, expressed                        | 438 | 205   |
| X15052    | neural cell adhesion molecule 1                                    | 434 | 94    |
| NM_026602 | breast carcinoma amplified sequence 2                              | 433 | 154   |



|           |                                                               |     |      |
|-----------|---------------------------------------------------------------|-----|------|
| NM_026329 | polymerase (RNA) II (DNA directed) polypeptide G              | 432 | 196  |
| AK010310  | RIKEN cDNA 4930588A18 gene                                    | 430 | -50  |
| BC020098  | RIKEN cDNA 1190006A08 gene                                    | 429 | 233  |
| NM_053092 | lysyl-tRNA synthetase                                         | 426 | 134  |
| AK016482  | toll interacting protein                                      | 423 | 224  |
| X66091    | M.musculus ASF mRNA                                           | 416 | 140  |
| AA408365  | expressed sequence AA408365                                   | 412 | 212  |
| AU021596  | RIKEN cDNA 9430029A22 gene                                    | 410 | 221  |
| AV216117  | ESTs                                                          | 408 | 221  |
| BC008638  | Mus musculus, Similar to aspartyl-tRNA synthetase, clone MGC  | 407 | 192  |
| NM_009984 | cathepsin L                                                   | 406 | 152  |
| BF160184  | expressed sequence C77286                                     | 403 | 228  |
| AK004661  | RIKEN cDNA 1200009B18 gene                                    | 402 | 215  |
| X53176    | integrin alpha 4                                              | 398 | 104  |
| NM_021420 | serine/threonine kinase 4                                     | 395 | 203  |
| BF180997  | expressed sequence D18386                                     | 394 | -55  |
| BI408480  | expressed sequence AA407055                                   | 391 | 119  |
| ET62761   |                                                               | 391 | 40   |
| AK012540  | tyrosine 3-monooxygenase/tryptophan 5-monooxygenase activa    | 378 | 176  |
| NM_025927 | mitochondrial ribosomal protein L45                           | 376 | 44   |
| BG246296  | EST AA408648                                                  | 374 | 171  |
| AK009476  | RIKEN cDNA 2310022K01 gene                                    | 373 | 199  |
| BC025146  | uridine monophosphate kinase                                  | 362 | 34   |
| NM_130885 | nucleolar protein C7                                          | 359 | 168  |
| D00925    |                                                               | 354 | 165  |
| AA117905  |                                                               | 350 | -265 |
| AK012154  | phenylalanine-tRNA synthetase-like                            | 348 | -634 |
| NM_009444 | trans-golgi network protein 2                                 | 347 | -59  |
| BC025597  | Mus musculus, Similar to calcium/calmodulin-dependent protein | 345 | 113  |
| AB021860  | activator of basal transcription                              | 344 | 137  |
| NM_011244 | retinoic acid receptor, gamma                                 | 342 | 109  |
| BG092263  | ESTs, Weakly similar to TLM MOUSE TLM PROTEIN [M.muscul       | 341 | -5   |
| NM_009498 | vesicle-associated membrane protein 3                         | 337 | 54   |
| NM_009101 | Harvey rat sarcoma oncogene, subgroup R                       | 335 | 42   |
| AK017688  | RIKEN cDNA 5730469M10 gene                                    | 334 | -74  |
| AF325921  | SWI/SNF related, matrix associated, actin dependent regulator | 331 | 171  |
| U46956    |                                                               | 330 | 146  |
| NM_025647 | RIKEN cDNA 0610011D08 gene                                    | 330 | 126  |
| BG174161  | DNA segment, Chr 8, ERATO Doi 69, expressed                   | 328 | 157  |
| NM_010796 | macrophage galactose N-acetyl-galactosamine specific lectin   | 326 | 137  |
| NM_009443 | trans-golgi network protein 1                                 | 326 | 176  |
| NM_133347 | RIKEN cDNA 2810477H02 gene                                    | 322 | 61   |
| NM_021714 | WW domain binding protein 11                                  | 317 | -151 |
| W29523    | DNA segment, Chr 8, Brigham & Women's Genetics 1112 expre     | 316 | 169  |
| BC017639  | ATPase, Ca <sup>++</sup> transporting, ubiquitous             | 313 | 170  |
| NM_008637 | nudix (nucleoside diphosphate linked moiety X)-type motif 1   | 309 | 143  |
| BC002040  | RIKEN cDNA 0610009H04 gene                                    | 303 | -331 |
| AA163967  |                                                               | 303 | 10   |
| NM_019479 | hairy and enhancer of split 6, (Drosophila)                   | 302 | -172 |
| NM_008847 | phosphatidylinositol-4-phosphate 5-kinase, type 1 beta        | 302 | 101  |
| NM_008898 | P450 (cytochrome) oxidoreductase                              | 301 | 149  |
| NM_019491 | v-ral simian leukemia viral oncogene homolog A (ras related)  | 296 | 91   |

|           |                                                                     |     |      |
|-----------|---------------------------------------------------------------------|-----|------|
| NM_033080 | DNA segment, Chr 7, Roswell Park 2 complex, expressed               | 293 | 113  |
| BC003300  | ATP-binding cassette, sub-family F (GCN20), member 2                | 292 | -33  |
| NM_011334 | chloride channel 4-2                                                | 289 | 102  |
| AK004765  | zinc finger protein 263                                             | 287 | 71   |
| NM_023526 | RIKEN cDNA 2400004O09 gene                                          | 287 | 53   |
| NM_009147 | SEC23A ( <i>S. cerevisiae</i> )                                     | 287 | 137  |
| AK005891  | RIKEN cDNA 1700012B15 gene                                          | 284 | 149  |
| BC025821  | <i>Mus musculus</i> , clone MGC:37860 IMAGE:5100400, mRNA, cor      | 280 | 71   |
| NM_133874 | RIKEN cDNA 4833432B22 gene                                          | 279 | 143  |
| BC019806  | <i>Mus musculus</i> , clone MGC:30933 IMAGE:4018387, mRNA, cor      | 277 | 147  |
| NM_026172 | 2,4-dienoyl CoA reductase 1, mitochondrial                          | 277 | 154  |
| AK004820  | protease, serine, 15                                                | 277 | -536 |
| NM_032396 | kringle containing transmembrane protein                            | 275 | 140  |
| BB628221  | expressed sequence R75565                                           | 274 | -39  |
| W97919    |                                                                     | 272 | -232 |
| NM_031168 | interleukin 6                                                       | 270 | 98   |
| AK014175  | RIKEN cDNA 3110043O21 gene                                          | 267 | 135  |
| NM_011431 | U5 small nuclear ribonucleoprotein 116 kDa                          | 264 | -455 |
| AF263240  | Down syndrome critical region homolog 1 (human)                     | 263 | -55  |
| NM_023813 | calcium/calmodulin-dependent protein kinase II, delta               | 262 | 43   |
| NM_009320 | solute carrier family 6 (neurotransmitter transporter, taurine), me | 261 | 102  |
| BC013538  | RIKEN cDNA 2010320B01 gene                                          | 260 | -151 |
| AK010307  | RIKEN cDNA 2310039H15 gene                                          | 259 | -44  |
| BC006645  | <i>Mus musculus</i> , Similar to alpha 1,2-mannosidase, clone IMAGE | 257 | 69   |
| NM_010585 | inositol 1,4,5-triphosphate receptor 1                              | 251 | 76   |
| BC027432  | <i>Mus musculus</i> , clone IMAGE:3982770, mRNA, partial cds        | 249 | 89   |
| BG977089  | expressed sequence C76907                                           | 245 | 116  |
| NM_011317 | KH domain containing, RNA binding, signal transduction associ       | 244 | 81   |
| BG298004  | EST AA407874                                                        | 243 | 34   |
| NM_080633 | aconitase 2, mitochondrial                                          | 241 | 66   |
| ET61288   |                                                                     | 240 | 56   |
| NM_010264 | nuclear receptor subfamily 6, group A, member 1                     | 238 | 116  |
| AK004285  | RIKEN cDNA 1110057K04 gene                                          | 235 | 6    |
| BC013719  | RIKEN cDNA 2610313E07 gene                                          | 235 | 49   |
| AI592192  | RIKEN cDNA 5830431A10 gene                                          | 235 | -170 |
| AA067335  |                                                                     | 234 | 38   |
| NM_026369 | actin related protein 2/3 complex, subunit 5 (165 kDa)              | 233 | -155 |
| AK013856  | <i>Mus musculus</i> 12 days embryo head cDNA, RIKEN full-length e   | 233 | 108  |
| BC025036  | <i>Mus musculus</i> , Similar to ligatin, clone IMAGE:4982955, mRNA | 230 | 73   |
| NM_007760 | carnitine acetyltransferase                                         | 227 | 85   |
| AK013955  | RIKEN cDNA 3110001K13 gene                                          | 226 | 92   |
| NM_134151 | expressed sequence AL024047                                         | 224 | 51   |
| AV280509  | ESTs                                                                | 223 | 99   |
| NM_138743 | RIKEN cDNA 1190017O12 gene                                          | 223 | 109  |
| BC002178  | enoyl Coenzyme A hydratase, short chain, 1, mitochondrial           | 222 | 29   |
| NM_008448 | kinesin family member 5B                                            | 219 | 78   |
| NM_031999 | transmembrane 7 superfamily member 1                                | 217 | 48   |
| NM_025791 | RIKEN cDNA 0610006I08 gene                                          | 216 | -69  |
| NM_009984 | cathepsin L                                                         | 214 | 44   |
| BF608270  | expressed sequence AA408125                                         | 214 | -36  |
| AK003758  | RIKEN cDNA 1110017N23 gene                                          | 214 | 106  |
| AK018153  | RIKEN cDNA 6330409N04 gene                                          | 210 | -6   |

|           |                                                                  |     |      |
|-----------|------------------------------------------------------------------|-----|------|
| AK007344  | RIKEN cDNA 1810005K14 gene                                       | 208 | 68   |
| NM_011847 | DnaJ (Hsp40) homolog, subfamily B, member 6                      | 202 | -597 |
| BC019407  | RIKEN cDNA 9430098E02 gene                                       | 200 | 84   |
| NM_019718 | ADP-ribosylation-like 3                                          | 194 | -138 |
| NM_052973 | nuclear autoantigen                                              | 193 | 21   |
| NM_007465 | baculoviral IAP repeat-containing 3                              | 192 | 10   |
| BG070774  | ESTs                                                             | 190 | 0    |
| ET61622   |                                                                  | 188 | -301 |
| NM_021463 | phosphoribosyl pyrophosphate synthetase 1                        | 185 | -73  |
| NM_011192 | proteasome (prosome, macropain) 28 subunit, 3                    | 185 | -59  |
| AK011391  | RIKEN cDNA 2610014F08 gene                                       | 184 | -27  |
| C80692    | expressed sequence C80692                                        | 183 | 100  |
| NM_013687 | t-complex protein 11                                             | 183 | 70   |
| AK018685  | RIKEN cDNA 9130422G05 gene                                       | 180 | -73  |
| AK005100  | RIKEN cDNA 1500001M20 gene                                       | 178 | 56   |
| BC021355  | RIKEN cDNA 2310044F10 gene                                       | 176 | 57   |
| NM_007658 | cell division cycle 25 homolog A ( <i>S. cerevisiae</i> )        | 176 | 84   |
| W29523    | DNA segment, Chr 8, Brigham & Women's Genetics 1112 exprc        | 175 | 73   |
| NM_007697 | close homolog of L1                                              | 173 | 45   |
| BC021494  | expressed sequence AA589382                                      | 165 | 90   |
| AB060650  | Mus musculus mRNA for small GTPase Tc10, complete cds            | 163 | 72   |
| C76261    | ESTs                                                             | 159 | 51   |
| W42399    |                                                                  | 159 | 38   |
| NM_009537 | YY1 transcription factor                                         | 158 | -355 |
| NM_025578 | mitochondrial ribosomal protein S25                              | 156 | 8    |
| BG078902  | expressed sequence C76294                                        | 155 | 58   |
| AK021172  | RIKEN cDNA C330002I19 gene                                       | 151 | -1   |
| AK012994  | RIKEN cDNA 2810405F18 gene                                       | 151 | 63   |
| BC010211  | expressed sequence AW495282                                      | 151 | 46   |
| AK013880  | asparaginyl-tRNA synthetase                                      | 150 | -211 |
| NM_010389 | histocompatibility 2, O region beta locus                        | 148 | -43  |
| BC026761  | RIKEN cDNA 4930421J07 gene                                       | 148 | 70   |
| NM_031494 | Zinc finger protein 275                                          | 147 | -8   |
| NM_009982 | cathepsin C                                                      | 147 | 59   |
| NM_009624 | adenylate cyclase 9                                              | 146 | 51   |
| NM_024258 | ubiquitin specific protease 16                                   | 146 | 38   |
| NM_018743 | putative lysophosphatidic acid acyltransferase                   | 145 | -112 |
| X13588    |                                                                  | 143 | -123 |
| BC025572  | Mus musculus, Similar to hypothetical protein, clone MGC:1925    | 142 | 2    |
| NM_026438 | RIKEN cDNA 2010317E03 gene                                       | 142 | -168 |
| BC013717  | Mus musculus, eukaryotic translation termination factor 1, clone | 141 | -296 |
| AA414957  | ESTs, Weakly similar to I49130 reverse transcriptase - mouse [I  | 141 | 37   |
| NM_009454 | ubiquitin-conjugating enzyme E2E 3, UBC4/5 homolog (yeast)       | 139 | 73   |
| BC017514  | RIKEN cDNA 2600013G09 gene                                       | 138 | -437 |
| AF090190  | kinesin heavy chain member 1B                                    | 136 | 60   |
| AK013291  | RIKEN cDNA 2810442I22 gene                                       | 136 | 23   |
| BG066342  | ESTs                                                             | 136 | 6    |
| W49913    |                                                                  | 135 | -154 |
| AF356522  | dynein, axon, heavy chain 8                                      | 135 | -135 |
| NM_018764 | protocadherin 7                                                  | 134 | 17   |
| NM_021522 | ubiquitin specific protease 14                                   | 133 | 1    |
| NM_016812 | Btg3 associated nuclear protein                                  | 131 | 22   |

|           |                                                                  |     |      |
|-----------|------------------------------------------------------------------|-----|------|
| C76438    | DNA segment, Chr 10, ERATO Doi 17, expressed                     | 131 | -88  |
| W51132    |                                                                  | 129 | -18  |
| NM_134151 | expressed sequence AL024047                                      | 127 | 54   |
| BG293664  | expressed sequence AI181996                                      | 126 | -281 |
| NM_011895 | solute carrier family 35 (CMP-sialic acid transporter), member 1 | 125 | 53   |
| AK013334  | DNA segment, Chr 1, Wayne State University 40, expressed         | 124 | -239 |
| NM_138599 | DNA segment, Chr 16, Wayne State University 109, expressed       | 123 | 27   |
| NM_133806 | expressed sequence AA420407                                      | 121 | -23  |
| M16395    |                                                                  | 119 | -108 |
| NM_009427 | transducer of ErbB-2.1                                           | 118 | 66   |
| NM_009034 | retinol binding protein 2, cellular                              | 117 | 22   |
| BB051001  | ESTs                                                             | 115 | 18   |
| NM_133968 | RIKEN cDNA 0610007H10 gene                                       | 114 | -73  |
| AA021692  |                                                                  | 113 | 54   |
| BC026459  | small EDRK-rich factor 2                                         | 113 | -35  |
| NM_019800 | acid phosphatase 6, lysophosphatidic                             | 112 | -184 |
| AK012196  | phosphatidylinositol-4-phosphate 5-kinase, type II, alpha        | 112 | -276 |
| BC027404  | Mus musculus, Similar to hypothetical protein FLJ20244, clone I  | 107 | -193 |
| BC006595  | Mus musculus, Similar to NDRG family, member 4, clone MGC:       | 107 | -39  |
| NM_011757 | zinc finger proliferation 1                                      | 106 | -15  |
| BC027747  | RAD23b homolog (S. cerevisiae)                                   | 104 | -149 |
| NM_016706 | coilin                                                           | 103 | -77  |
| NM_011561 | thymine DNA glycosylase                                          | 103 | 18   |
| NM_018813 | cleavage and polyadenylation specificity factor 3                | 102 | -33  |
| BF101775  | DNA segment, Chr 5, Wayne State University 31, expressed         | 101 | -54  |
| AA061002  |                                                                  | 101 | 13   |
| BC022140  | Mus musculus, clone IMAGE:5101040, mRNA, partial cds             | 100 | 30   |
