# Supplementary material
Source: PubMed Central journal article supplement (PMC299895)
Supplement: pnas_100_25_15035__2.pdf [file pnas_100_25_15035__2.pdf]

**Table 3. Genes increased by MnTBAP****Cell Structure / Cell Surface**

| <b>Genbank</b> | <b>Gene Name</b>                                                         | <b>MnTBAP</b> | <b>SEB</b> |
|----------------|--------------------------------------------------------------------------|---------------|------------|
| NM_007393      | actin, beta, cytoplasmic                                                 | 15129         | 4974       |
| AK009844       | clathrin, light polypeptide (Lcb)                                        | 2273          | 809        |
| NM_013489      | CD84 antigen                                                             | 2050          | 623        |
| M30441         | intronless potassium channel gene MK3                                    | 1423          | 597        |
| NM_007502      | ATPase, Na <sup>+</sup> /K <sup>+</sup> transporting, beta 3 polypeptide | 1202          | 522        |
| NM_010577      | integrin alpha 5 (fibronectin receptor alpha)                            | 790           | 241        |
| NM_019759      | dermatopontin                                                            | 718           | 23         |
| ET63482        | synaptonemal complex protein 1 (Scp1)                                    | 692           | 294        |
| D50095         | histamine H1 receptor                                                    | 685           | 125        |
| NM_030694      | interferon induced transmembrane protein 3-like                          | 660           | 286        |
| AJ278733       | myosin, heavy polypeptide 4, skeletal muscle                             | 588           | 238        |
| J03458         | filaggrin                                                                | 519           | 133        |
| ET61617        | 5E6 (5E6/Ly-49C)                                                         | 312           | 129        |
| NM_010107      | ephrin A1                                                                | 293           | 128        |
| NM_016885      | endomucin                                                                | 282           | 25         |
| NM_013489      | CD84 antigen                                                             | 101           | 22         |

**Signal Transduction**

|           |                                                     | <b>MnTBAP</b> | <b>SEB</b> |
|-----------|-----------------------------------------------------|---------------|------------|
| NM_018738 | interferon gamma induced GTPase                     | 3894          | 1038       |
| NM_011306 | retinoid X receptor beta                            | 3702          | -2937      |
| NM_021305 | SEC61, alpha subunit 2 ( <i>S. cerevisiae</i> )     | 1593          | 699        |
| NM_007930 | ectodermal-neural cortex 1                          | 1560          | 296        |
| NM_133977 | transferrin                                         | 1485          | 302        |
| NM_008380 | inhibin beta-A                                      | 1443          | 632        |
| NM_008714 | Notch gene homolog 1, ( <i>Drosophila</i> )         | 1348          | 80         |
| NM_011579 | T-cell specific GTPase                              | 1256          | 303        |
| NM_008795 | PCTAIRE-motif protein kinase 3                      | 1212          | 213        |
| D00622    | LDL receptor-related protein associated protein 1   | 1193          | 518        |
| BC017678  | ral guanine nucleotide dissociation stimulator      | 1191          | 478        |
| AK010554  | G protein, gamma transducing activity polypeptide 2 | 1160          | 466        |
| NM_019781 | peroxisomal biogenesis factor 14                    | 1026          | 49         |
| AF263240  | Down syndrome critical region homolog 1 (human)     | 979           | 416        |
| D28530    | protein tyrosine phosphatase, receptor type, S      | 752           | 210        |
| NM_007795 | cardiotrophin 1                                     | 721           | 110        |
| NM_008326 | interferon inducible protein 1                      | 629           | 145        |
| NM_020009 | FK506 binding protein 12-RAP-1                      | 607           | 265        |
| NM_011126 | palate, lung, and nasal epithelium expressed        | 594           | 255        |
| X96606    | ovary testis transcribed                            | 565           | 54         |
| NM_010313 | guanine nucleotide binding protein, beta 5          | 523           | 189        |
| NM_017473 | retinol dehydrogenase 7                             | 504           | 61         |
| AK005067  | calcium binding protein P22                         | 472           | 193        |
| NM_007996 | ferredoxin 1                                        | 428           | 136        |
| NM_008068 | GABA-A receptor, subunit alpha 6                    | 383           | 155        |
| X69722    | insulin receptor substrate 1                        | 377           | 117        |
| NM_008363 | interleukin 1 receptor-associated kinase            | 360           | 121        |
| AF453686  | ELKL motif serine-threonine protein kinase 3        | 234           | 66         |
| NM_020047 | tumor-associated calcium signal transducer 2        | 220           | 17         |
| NM_021516 | MAP/microtubule affinity-regulating kinase 3        | 166           | 68         |
| NM_053089 | NMDA receptor-regulated gene 1                      | 124           | -2         |

| Genbank   | Gene Name                         | MnTBAP | SEB |
|-----------|-----------------------------------|--------|-----|
| NM_013498 | cAMP responsive element modulator | 119    | 29  |

| Gene Expression / Nucleic Acid Binding |                                                   | MnTBAP | SEB |
|----------------------------------------|---------------------------------------------------|--------|-----|
| D32200                                 | helix-loop-helix transcription factor             | 2102   | 915 |
| NM_010916                              | nescient helix loop helix 1                       | 1881   | 693 |
| NM_019711                              | RNA binding motif, ss interacting protein 2       | 1355   | 198 |
| NM_016660                              | high mobility group AT-hook 1                     | 1222   | 486 |
| ET61506                                | transcription factor Id1B (Id1B)                  | 1181   | 223 |
| NM_007923                              | ELK4, member of ETS oncogene family               | 1181   | 421 |
| AF151110                               | constitutive photomorphogenic protein 1           | 683    | 179 |
| M76987                                 | alpha-globin transcription factor                 | 667    | 122 |
| NM_030724                              | uridine-cytidine kinase 2                         | 663    | 254 |
| NM_010914                              | nuclear transcription factor-Y beta               | 564    | 229 |
| NM_007855                              | dermis expressed 1                                | 542    | 187 |
| NM_026810                              | mutL homolog 1 (E. coli)                          | 480    | 43  |
| NM_016777                              | nuclear autoantigenic sperm protein               | 394    | 150 |
| NM_018796                              | eukaryotic translation elongation factor 1 beta 2 | 370    | 156 |
| AK011489                               | replication factor C (activator 1) 5 (36.5 kDa)   | 326    | 39  |
| NM_027139                              | TAF9 RNA polymerase II, TBP-associated factor     | 265    | 37  |
| AK008264                               | inhibitor of DNA binding 1                        | 203    | 22  |
| NM_009352                              | telomeric repeat binding factor 1                 | 157    | 61  |
| AK019451                               | eukaryotic translation initiation factor 1A       | 113    | 17  |

| Apoptosis / Oncogenes |                                           | MnTBAP | SEB |
|-----------------------|-------------------------------------------|--------|-----|
| L31532                | bcl2-alpha                                | 1827   | 617 |
| BF120858              | neoplastic progression 3                  | 340    | 62  |
| ET61316               | Mus musculus senescence marker protein-30 | 276    | 112 |
| NM_008591             | met proto-oncogene                        | 111    | -6  |

| Enzymes/Proteases |                                          | MnTBAP | SEB  |
|-------------------|------------------------------------------|--------|------|
| NM_007446         | amylase 1, salivary                      | 3316   | 1318 |
| NM_011900         | mannose-P-dolichol utilization defect 1  | 2720   | 1075 |
| L00654            | mast cell protease-7 gene                | 2015   | 852  |
| AK012951          | proteasome 26S subunit, non-ATPase, 11   | 1933   | 727  |
| NM_019949         | ubiquitin-conjugating enzyme 8           | 1686   | 564  |
| NM_016757         | WW domain binding protein 1              | 594    | 182  |
| NM_011321         | spermine binding protein                 | 359    | 150  |
| NM_011456         | serine protease inhibitor 14             | 204    | 52   |
| NM_008939         | protease, serine, 12 neurotrypsin        | 187    | 79   |
| BC006696          | casein beta                              | 166    | 65   |
| NM_013778         | aldo-keto reductase family 1, member C13 | 160    | 43   |

| Immunity  |                                                | MnTBAP | SEB |
|-----------|------------------------------------------------|--------|-----|
| ET61286   | anti-DNA heavy chain variable region           | 1339   | 425 |
| U12565    | defensin-like gene 4C-4                        | 1255   | 382 |
| M12815    | TCR active gamma-chain V10.8B-J-C10.8          | 884    | 382 |
| X12729    | TCR rearranged delta-chain mRNA V-D-J-C region | 685    | 207 |
| NM_009605 | adipocyte complement related protein of 30 kDa | 522    | 179 |
| ET61970   | anti-DNA light chain IgG, 384s.63              | 509    | 107 |
| ET61832   | anti-DNA heavy chain IgG, 384p.113             | 450    | 161 |
| ET61828   | anti-DNA heavy chain IgG, 373s.116             | 305    | 110 |
| NM_010390 | histocompatibility 2, Q region locus 1         | 253    | -21 |

| <b>Genbank</b> | <b>Gene Name</b>                  | <b>MnTBAP</b> | <b>SEB</b> |
|----------------|-----------------------------------|---------------|------------|
| ET62271        | TCR variable and J region mRNA.   | 243           | -96        |
| NM_011314      | serum amyloid A 2                 | 233           | 94         |
| NM_009888      | complement component factor h     | 185           | 19         |
| ET61833        | anti-DNA heavy chain IgG, 384p.20 | 145           | 6          |

| <b>Mitochondria</b> |                                       | <b>MnTBAP</b> | <b>SEB</b> |
|---------------------|---------------------------------------|---------------|------------|
| L22181              | N-formyl peptide chemotactic receptor | 1264          | 439        |
| NM_008706           | NAD(P)H dehydrogenase, quinone 1      | 296           | 118        |
| NM_008042           | formyl peptide receptor-like 1        | 181           | 72         |
