# Supplementary material
Source: PubMed Central journal article supplement (PMC299895)
Supplement: pnas_100_25_15035__3.pdf [file pnas_100_25_15035__3.pdf]

**Table 4. Genes decreased by MntBAP**

| <b>Cell Structure / Cell Surface</b> |                                                                             | <b>MntBAP</b> | <b>SEB</b> |
|--------------------------------------|-----------------------------------------------------------------------------|---------------|------------|
| <b>Genbank</b>                       | <b>Gene Name</b>                                                            |               |            |
| AK004554                             | actin-related protein 3 homolog (yeast)                                     | 2628          | 5444       |
| NM_018772                            | brain protein I3                                                            | 1247          | 2841       |
| NM_011787                            | autocrine motility factor receptor                                          | 1231          | 2207       |
| NM_011390                            | solute carrier family 12, member 7                                          | 184           | 2087       |
| NM_026552                            | actin related protein 2/3 complex, subunit 4                                | 923           | 2012       |
| NM_030238                            | dynein, cytoplasmic, heavy chain 1                                          | 820           | 1765       |
| NM_007932                            | endoglin                                                                    | 635           | 1274       |
| NM_011722                            | dynactin 6                                                                  | 467           | 1139       |
| NM_018739                            | retinitis pigmentosa 9 homolog (human)                                      | 454           | 847        |
| NM_008577                            | scf 3 (activators of dibasic and neutral amino acid transport)              | -611          | 572        |
| BC025618                             | Similar to ATPase, Na <sup>+</sup> /K <sup>+</sup> transporting, alpha 1a.1 | 28            | 517        |
| NM_009287                            | stromal interaction molecule 1                                              | -98           | 457        |
| X15052                               | neural cell adhesion molecule 1                                             | 94            | 434        |
| X53176                               | integrin alpha 4                                                            | 104           | 398        |
| NM_010796                            | macrophage galactose N-acetyl-galactosamine specific lectin                 | 137           | 326        |
| BC003300                             | ATP-binding cassette, sub-family F (GCN20), member 2                        | -33           | 292        |
| NM_011334                            | chloride channel 4-2                                                        | 102           | 289        |
| NM_032396                            | kringle containing transmembrane protein                                    | 140           | 275        |
| NM_009320                            | scf 6 (neurotransmitter transporter, taurine), member 6                     | 102           | 261        |
| NM_026369                            | actin related protein 2/3 complex, subunit 5 (165 kDa)                      | -155          | 233        |
| NM_008448                            | kinesin family member 5B                                                    | 78            | 219        |
| NM_013687                            | t-complex protein 11                                                        | 70            | 183        |
| NM_007697                            | close homolog of L1                                                         | 45            | 173        |
| AF090190                             | kinesin heavy chain member 1B                                               | 60            | 136        |
| AF356522                             | dynein, axon, heavy chain 8                                                 | -135          | 135        |
| NM_018764                            | protocadherin 7                                                             | 17            | 134        |
| NM_011895                            | scf 35 (CMP-sialic acid transporter), mem ber 1                             | 53            | 125        |
| <b>Signal Transduction</b>           |                                                                             | <b>MntBAP</b> | <b>SEB</b> |
| NM_010907                            | I-kappa B alpha chain                                                       | 3278          | 6159       |
| BC003707                             | SEC61, alpha subunit ( <i>S. cerevisiae</i> )                               | 1210          | 4526       |
| BC021473                             | CDP-diacylglycerol--inositol 3-phosphatidyltransferase                      | 1543          | 3838       |
| AJ131777                             | src-like adaptor protein                                                    | 627           | 2430       |
| NM_011103                            | protein kinase C, delta                                                     | 740           | 1446       |
| NM_007406                            | adenylate cyclase 7                                                         | 764           | 1409       |
| NM_009048                            | RalBP1 associated Eps domain containing protein                             | 661           | 1200       |
| NM_017380                            | septin 9                                                                    | 518           | 1132       |
| NM_011368                            | src homology 2 domain-containing transforming protein C1                    | 554           | 1025       |
| AK014542                             | huntingtin interacting protein 1 related                                    | 327           | 975        |
| NM_024289                            | oxysterol binding protein homolog 1                                         | -335          | 807        |
| NM_019772                            | small acidic protein                                                        | 420           | 792        |
| AF075461                             | development and differentiation enhancing                                   | 366           | 778        |
| NM_029780                            | v-raf-1 leukemia viral oncogene 1                                           | 35            | 770        |
| AK005067                             | calcium binding protein P22                                                 | 396           | 770        |
| NM_018804                            | synaptotagmin 11                                                            | 387           | 769        |
| AK018785                             | RAS-like protein expressed in many tissues                                  | 358           | 688        |
| NM_019774                            | A kinase (PRKA) anchor protein 8                                            | 347           | 628        |
| NM_021537                            | serine/threonine kinase 25 (yeast)                                          | 245           | 513        |
| AK016482                             | toll interacting protein                                                    | 224           | 423        |

| <b>Genbank</b> | <b>Gene Name</b>                                          | <b>MnTBAP</b> | <b>SEB</b> |
|----------------|-----------------------------------------------------------|---------------|------------|
| NM_021420      | serine/threonine kinase 4                                 | 203           | 395        |
| BC025597       | Similar to CaM kinase II beta                             | 113           | 345        |
| NM_011244      | retinoic acid receptor, gamma                             | 109           | 342        |
| U46956         | 66 Kd isoform of src homology collagen protein            | 146           | 330        |
| NM_009443      | trans-golgi network protein 1                             | 176           | 326        |
| BC017639       | ATPase, Ca <sup>++</sup> transporting, ubiquitous         | 170           | 313        |
| NM_008847      | phosphatidylinositol-4-phosphate 5-kinase, type 1 beta    | 101           | 302        |
| NM_019491      | v-ral simian leukemia viral oncogene homolog A            | 91            | 296        |
| NM_009147      | SEC23A ( <i>S. cerevisiae</i> )                           | 137           | 287        |
| NM_031168      | interleukin 6                                             | 98            | 270        |
| AF263240       | Down syndrome critical region homolog 1 (human)           | -55           | 263        |
| NM_023813      | calcium/calmodulin-dependent protein kinase II, delta     | 43            | 262        |
| NM_010585      | inositol 1,4,5-triphosphate receptor 1                    | 76            | 251        |
| NM_031999      | transmembrane 7 superfamily member 1                      | 48            | 217        |
| NM_019718      | ADP-ribosylation-like 3                                   | -138          | 194        |
| ET61622        | putative protein kinase MRK3                              | -301          | 188        |
| NM_021463      | phosphoribosyl pyrophosphate synthetase 1                 | -73           | 185        |
| AB060650       | Mus musculus mRNA for small GTPase Tc10, complete cds     | 72            | 163        |
| NM_009624      | adenylate cyclase 9                                       | 51            | 146        |
| NM_009034      | retinol binding protein 2, cellular                       | 22            | 117        |
| AK012196       | phosphatidylinositol-4-phosphate 5-kinase, type II, alpha | -276          | 112        |

| <b>Gene Expression / Nucleic Acid Binding</b> | <b>MnTBAP</b>                                          | <b>SEB</b> |      |
|-----------------------------------------------|--------------------------------------------------------|------------|------|
| NM_013866                                     | zinc finger protein 385                                | 2898       | 5894 |
| NM_010365                                     | general transcription factor II I                      | 2524       | 4978 |
| NM_008672                                     | nucleosome assembly protein 1-like 4                   | 886        | 2663 |
| NM_010286                                     | glucocorticoid-induced leucine zipper                  | 1277       | 2597 |
| NM_133206                                     | zinc ring finger protein 1                             | 1299       | 2378 |
| NM_021538                                     | coatamer protein complex, subunit epsilon              | 1035       | 1944 |
| NM_013595                                     | methyl-CpG binding domain protein 3                    | 913        | 1849 |
| NM_018749                                     | eukaryotic translation initiation factor 3, subunit 7  | 668        | 1602 |
| AK012154                                      | phenylalanine-tRNA synthetase-like                     | 686        | 1558 |
| NM_023240                                     | eukaryotic translation elongation factor 1 delta       | 345        | 1495 |
| NM_010500                                     | immediate early response 5                             | 722        | 1283 |
| NM_007932                                     | endoglin                                               | 635        | 1274 |
| NM_009279                                     | signal sequence receptor, delta                        | 535        | 1250 |
| BC011391                                      | upstream regulatory element binding protein 1          | 584        | 1246 |
| NM_010286                                     | glucocorticoid-induced leucine zipper                  | 476        | 1232 |
| NM_009048                                     | RalBP1 associated Eps domain containing protein        | 661        | 1200 |
| NM_026578                                     | nucleolar protein family A, member 1                   | 607        | 1193 |
| NM_021465                                     | stromal antigen 2                                      | 533        | 1189 |
| ET61635                                       | retinoblastoma-related protein p130                    | 486        | 1180 |
| NM_019479                                     | hairy and enhancer of split 6, ( <i>Drosophila</i> )   | 531        | 964  |
| NM_008138                                     | guanine nucleotide binding protein, alpha inhibiting 2 | 87         | 946  |
| BC012408                                      | calnexin                                               | 465        | 912  |
| NM_080461                                     | zinc finger protein 358                                | 446        | 891  |
| AF316548                                      | zinc finger protein 148                                | 386        | 832  |
| NM_011803                                     | core promoter element binding protein                  | 349        | 792  |
| AK012944                                      | U2 small nuclear ribonucleoprotein B                   | 409        | 786  |
| NM_013916                                     | Hoxa1 regulated gene                                   | 303        | 682  |
| NM_008672                                     | nucleosome assembly protein 1-like 4                   | 353        | 672  |
| NM_024226                                     | reticulon 4                                            | 320        | 671  |

| Genbank   | Gene Name                                                | MnTBAP | SEB |
|-----------|----------------------------------------------------------|--------|-----|
| AK014325  | RAE1 RNA export 1 homolog (S. pombe)                     | 234    | 634 |
| NM_133247 | Vhlh-interacting deubiquitinating enzyme 1               | 314    | 626 |
| AF374266  | sterol regulatory element binding factor 1               | -102   | 620 |
| ET62993   | M.musculus mRNA fragment for Ki-67 antigen.              | 318    | 616 |
| AY007594  | transcription factor 20                                  | 205    | 616 |
| X54327    | M.musculus mRNA for glutamyl-tRNA synthetase             | 300    | 599 |
| BC016637  | general transcription factor IIB                         | -181   | 562 |
| AK012358  | ring finger protein 2                                    | 82     | 559 |
| NM_007622 | chromobox homolog 1 (Drosophila HP1 beta)                | 198    | 535 |
| NM_019502 | fractured callus expressed transcript 1                  | 256    | 532 |
| BC013716  | heat shock factor 1                                      | 252    | 520 |
| M77167    | activating transcription factor 2                        | 136    | 486 |
| BC028325  | G1 to phase transition 1                                 | 223    | 460 |
| NM_020587 | splicing factor, arginine/serine-rich 4 (SRp75)          | -437   | 458 |
| NM_009125 | spinocerebellar ataxia 2 homolog (human)                 | 141    | 455 |
| NM_026329 | polymerase (RNA) II (DNA directed) polypeptide G         | 196    | 432 |
| NM_053092 | lysyl-tRNA synthetase                                    | 134    | 426 |
| X66091    | M.musculus ASF mRNA                                      | 140    | 416 |
| BC025146  | uridine monophosphate kinase                             | 34     | 362 |
| NM_130885 | nucleolar protein C7                                     | 168    | 359 |
| AK012154  | phenylalanine-tRNA synthetase-like                       | -634   | 348 |
| NM_009444 | trans-golgi network protein 2                            | -59    | 347 |
| AB021860  | activator of basal transcription                         | 137    | 344 |
| AF325921  | actin dep. regulator of chromatin, subfamily a, member 5 | 171    | 331 |
| NM_008637 | 8-oxo-dGTPase                                            | 143    | 309 |
| NM_019479 | hairy and enhancer of split 6, (Drosophila)              | -172   | 302 |
| AK004765  | zinc finger protein 263                                  | 71     | 287 |
| NM_011431 | U5 small nuclear ribonucleoprotein 116 kDa               | -455   | 264 |
| NM_011317 | KH domain containing, RNA binding                        | 81     | 244 |
| NM_010264 | nuclear receptor subfamily 6, group A, member 1          | 116    | 238 |
| NM_052973 | nuclear autoantigen                                      | 21     | 193 |
| NM_007658 | cell division cycle 25 homolog A (S. cerevisiae)         | 84     | 176 |
| NM_009537 | YY1 transcription factor                                 | -355   | 158 |
| AK013880  | asparaginyl-tRNA synthetase                              | -211   | 150 |
| NM_031494 | Zinc finger protein 275                                  | -8     | 147 |
| BC013717  | eukaryotic translation termination factor 1              | -296   | 141 |
| NM_016812 | Btg3 associated nuclear protein                          | 22     | 131 |
| NM_011757 | zinc finger proliferation 1                              | -15    | 106 |
| BC027747  | RAD23b homolog (S. cerevisiae)                           | -149   | 104 |
| NM_016706 | coilin                                                   | -77    | 103 |
| NM_011561 | thymine DNA glycosylase                                  | 18     | 103 |
| NM_018813 | cleavage and polyadenylation specificity factor 3        | -33    | 102 |

#### Apoptosis / Oncogenes

|           |                                                | MnTBAP | SEB |
|-----------|------------------------------------------------|--------|-----|
| NM_007828 | death-associated kinase 3                      | 433    | 795 |
| NM_009396 | tumor necrosis factor, alpha-induced protein 2 | 337    | 621 |
| NM_009101 | Harvey rat sarcoma oncogene, subgroup R        | 42     | 335 |
| NM_007465 | baculoviral IAP repeat-containing 3            | 10     | 192 |

#### Enzymes/Proteases

|           |                                           | MnTBAP | SEB  |
|-----------|-------------------------------------------|--------|------|
| NM_008906 | protective protein for beta-galactosidase | 1615   | 3219 |
| NM_030702 | smt3-specific isopeptidase 1              | 726    | 1679 |

| Genbank   | Gene Name                                                                 | MnTBAP | SEB  |
|-----------|---------------------------------------------------------------------------|--------|------|
| NM_015749 | transcobalamin 2                                                          | 627    | 1558 |
| NM_022310 | heat shock 70kD protein 5 (glucose-regulated protein, 78kD)               | 388    | 1280 |
| NM_011738 | tyr. 3-monooxyg./trypt. 5-monooxy. activation protein, eta                | 377    | 1086 |
| AK012540  | tyr. 3-monooxyg./trypt. 5-monooxyg. activation protein, theta polypeptide | 213    | 882  |
| NM_008220 | hemoglobin, beta adult major chain                                        | 338    | 718  |
| NM_013635 | pantophysin                                                               | 332    | 660  |
| NM_010794 | mannoside acetylglucosaminyltransferase 1                                 | -180   | 612  |
| NM_008292 | hydroxysteroid (17-beta) dehydrogenase 4                                  | 275    | 579  |
| NM_011740 | tyr. 3-monooxyg./trypt. 5-monooxyg. activation protein, zeta              | 263    | 521  |
| NM_019489 | peptidylprolyl isomerase E (cyclophilin E)                                | 281    | 509  |
| BC009147  | DEAD/H (Asp-Glu-Ala-Asp/His) box polypeptide 16                           | 252    | 453  |
| NM_009984 | cathepsin L                                                               | 152    | 406  |
| AK012540  | tyr. 3-monooxyg./trypt. 5-monooxyg. activation protein, theta             | 176    | 378  |
| NM_009498 | vesicle-associated membrane protein 3                                     | 54     | 337  |
| NM_021714 | WW domain binding protein 11                                              | -151   | 317  |
| AK004820  | protease, serine, 15                                                      | -536   | 277  |
| NM_009984 | cathepsin L                                                               | 44     | 214  |
| NM_011847 | DnaJ (Hsp40) homolog, subfamily B, member 6                               | -597   | 202  |
| NM_011192 | proteasome (prosome, macropain) 28 subunit, 3                             | -59    | 185  |
| NM_009982 | cathepsin C                                                               | 59     | 147  |
| NM_024258 | ubiquitin specific protease 16                                            | 38     | 146  |
| NM_018743 | putative lysophosphatidic acid acyltransferase                            | -112   | 145  |
| NM_009454 | ubiquitin-conjugating enzyme E2E 3, UBC4/5 homolog (yeast)                | 73     | 139  |
| NM_021522 | ubiquitin specific protease 14                                            | 1      | 133  |
| M16395    | M16395 Mouse alpha-fetoprotein (AFP) gene                                 | -108   | 119  |
| NM_019800 | acid phosphatase 6, lysophosphatidic                                      | -184   | 112  |

| Immunity  |                                                       | MnTBAP | SEB  |
|-----------|-------------------------------------------------------|--------|------|
| NM_019909 | MHC (A.CA/J(H-2K-f) class I antigen                   | 1965   | 3634 |
| U68543    | immunoglobulin kappa chain variable 28 (V28)          | 133    | 1112 |
| ET62534   | T-cell surface glycoprotein CD4                       | 537    | 988  |
| NM_009844 | CD19 antigen                                          | -253   | 654  |
| ET62761   | anti-von Willebrand factor antibody NMC-4 heavy chain | 40     | 391  |
| ET61288   | anti-DNA immunoglobulin heavy chain variable region   | 56     | 240  |
| NM_010389 | histocompatibility 2, O region beta locus             | -43    | 148  |
| X13588    | Murine crp gene for C-reactive protein.               | -123   | 143  |

| Mitochondria |                                                           | MnTBAP | SEB  |
|--------------|-----------------------------------------------------------|--------|------|
| NM_007494    | argininosuccinate synthetase 1                            | 1105   | 2569 |
| NM_013671    | superoxide dismutase 2, mitochondrial                     | 429    | 1141 |
| AK005710     | scf 25 (mitochondrial deoxynucleotide carrier), member 19 | 407    | 1043 |
| NM_013850    | ATP-binding cassette, sub-family A (ABC1), member 7       | 92     | 1022 |
| BC017687     | ubiquinol-cytochrome c reductase core protein 1           | 327    | 1020 |
| NM_009897    | creatine kinase, mitochondrial 1, ubiquitous              | 129    | 472  |
| NM_010926    | neighbor of Cox4                                          | 261    | 462  |
| NM_025927    | mitochondrial ribosomal protein L45                       | 44     | 376  |
| NM_008898    | P450 (cytochrome) oxidoreductase                          | 149    | 301  |
| NM_026172    | 2,4-dienoyl CoA reductase 1, mitochondrial                | 154    | 277  |
| NM_080633    | aconitase 2, mitochondrial                                | 66     | 241  |
| NM_007760    | carnitine acetyltransferase                               | 85     | 227  |
| BC002178     | enoyl Coenzyme A hydratase, short chain, 1, mitochondrial | 29     | 222  |
| NM_025578    | mitochondrial ribosomal protein S25                       | 8      | 156  |
